# Supplementary material for: Analysis of the human immunodeficiency virus-1 RNA packageome
Source: PubMed Central journal article supplement — RNA. 2016 Aug;22(8):1228–38. doi: 10.1261/rna.057299.116 (PMC4931115; doi:10.1261/rna.057299.116), 2016-08
Supplement: supp_057299.116_Supp_Tables_S1_S2.pdf [file supp_057299.116_Supp_Tables_S1_S2.pdf]

## Supplemental Material

### Analysis of the Human Immunodeficiency Virus-1 RNA Packageome

Matthew J. Eckwahl<sup>1</sup>, Helene Arnion<sup>1</sup>, Siarhei Kharytonchyk<sup>2</sup>, Trinity Zang<sup>3,4,5</sup>, Paul D. Bieniasz<sup>3,4,5</sup>, Alice Telesnitsky<sup>2</sup> and Sandra L. Wolin<sup>1,6,7</sup>

<sup>1</sup>Department of Cell Biology, Yale School of Medicine, New Haven, Connecticut, USA

<sup>2</sup>Department of Microbiology and Immunology, University of Michigan, Ann Arbor, Michigan, USA

<sup>3</sup>Aaron Diamond AIDS Research Center, The Rockefeller University, New York, New York, USA

<sup>4</sup>Laboratory of Retrovirology, The Rockefeller University, New York, New York, USA

<sup>5</sup>Howard Hughes Medical Institute, The Rockefeller University, New York, New York, USA

<sup>6</sup>Department of Molecular Biophysics and Biochemistry, Yale School of Medicine, New Haven, Connecticut, USA

<sup>7</sup>Yale Cancer Center, Yale School of Medicine, New Haven, Connecticut, USA

Correspondence should be addressed to: [sandra.wolin@yale.edu](mailto:sandra.wolin@yale.edu)

**Supplemental Table S1. Most abundant RNAs in HIV RNA-Seq**

| Replicate 1  |         | Replicate 2  |         |
|--------------|---------|--------------|---------|
| RNA          | TPM     | RNA          | TPM     |
| 7SL          | 755,390 | 7SL          | 728,117 |
| HIV gRNA     | 124,917 | HIV gRNA     | 144,495 |
| AluY         | 24,734  | 5.8S rRNA    | 41,790  |
| 18S rRNA     | 23,221  | 5S rRNA      | 22,657  |
| AluS         | 21,072  | 18S rRNA     | 14,805  |
| 5S rRNA      | 14,834  | AluY         | 8,634   |
| 5.8S rRNA    | 10,349  | 28S rRNA     | 7,933   |
| U1           | 4,466   | U1           | 7,465   |
| 28S rRNA     | 3,004   | AluS         | 5,932   |
| LINE-1 H     | 1,856   | snaR-A       | 2,493   |
| tRNA-Lys-CTT | 1,412   | U6atac       | 1,374   |
| U6           | 1,212   | vtRNA1-1     | 1,281   |
| AluJ         | 1,139   | mt 16S rRNA  | 1,175   |
| U2           | 1,035   | U6           | 843     |
| hY1          | 1,034   | mt 12S rRNA  | 842     |
| tRNA-Cys-GCA | 938     | tRNA-Lys-CTT | 692     |
| hY3          | 915     | hY4          | 656     |
| tRNA-Ala-TGC | 839     | tRNA-Ala-AGC | 610     |
| tRNA-Val-TAC | 764     | tRNA-Leu-CAA | 544     |
| RPPH1        | 714     | tRNA-Ala-TGC | 473     |
| U5           | 702     | hY1          | 454     |
| 7SK          | 655     | RPPH1        | 435     |
| U6atac       | 643     | LINE-1 H     | 430     |
| hY4          | 610     | tRNA-Val-TAC | 425     |
| snaR-A       | 509     | AluJ         | 413     |
| tRNA-Ile-AAT | 439     | U2           | 396     |
| tRNA-Asp-GTC | 306     | tRNA-Cys-GCA | 391     |
| tRNA-Tyr-GTA | 259     | tRNA-Ser-TGA | 374     |
| tRNA-Glu-CTC | 233     | 7SK          | 328     |
| mt 12S rRNA  | 231     | tRNA-Ser-GCT | 317     |
| mt 16S rRNA  | 212     | tRNA-Tyr-GTA | 252     |
| vtRNA1-1     | 173     | tRNA-Tyr-GTA | 252     |
| tRNA-Gly-TCC | 144     | tRNA-Ala-CGC | 230     |
| tRNA-Gly-GCC | 132     | tRNA-Glu-TTC | 208     |
| tRNA-Pro-TGG | 125     | hY3          | 197     |
| tRNA-Gln-TTG | 108     | tRNA-Lys-TTT | 186     |
| tRNA-Ser-TGA | 104     | tRNA-Ile-AAT | 176     |
| tRNA-Sec-TCA | 97      | tRNA-His-GTG | 132     |
| tRNA-Asn-GTT | 91      | tRNA-Gly-CCC | 129     |
| tRNA-Val-CAC | 89      | tRNA-Gly-TCC | 123     |
| RNaseMRP     | 83      | tRNA-Ile-TAT | 109     |
| tRNA-Ser-GCT | 58      | vtRNA2-1     | 107     |
| tRNA-Lys-TTT | 54      | U5           | 101     |

**Table S2. Oligonucleotides used in this study**

| <b>Probes for Northern blotting (5' to 3')</b> |                                     |
|------------------------------------------------|-------------------------------------|
| 7SL                                            | TTTTGACCTGCTCCGTTTCCGACCT           |
| tRNA-Lys-UUU                                   | GACCCTCAGATTAAGTCTGATGCTC           |
| hY1                                            | CTGACTGTGAACAATCAATTGAGATAACTCACTAC |
| hY3                                            | GAGTGGAGAAGGAACAAAGAAATCTG          |
| hY4                                            | GGGTTGTATACCAACTTTAGTGACAC          |
| hY5                                            | GGGAGACAATGTTAAATCAACTTAACAATAA     |
| snaR-A                                         | GACCCATGTGGACCAGGCTGGCCTCGAA        |
| vtRNA1-1                                       | AACCCAGACAGGTTGCTTGT                |
| U1                                             | GGATAAGCCTCGCCCTGGGAAA              |
| U6                                             | CTTCTCTGTATCGTTCCAATTTTAGTATAT      |
| 5S                                             | CGAGATCGGGCGCGTTCAGGGTGGTATGGCCGT   |
| tRNA-Cys-GCA                                   | ATGCTCTACCACTGAGCTATA               |
| tRNA-Ser-UGA                                   | CGCAGCGAGCAGGGTTCGAA                |
| tRNA-Tyr-GUA                                   | GGAATCGAACCAGCGACCTAAG              |
| tRNA-Ile-UAU intron                            | CATCACCCGCACATATACTGTTG             |
| tRNA-Ile-UAU mature                            | CTCACAACCTCGGCATTATAAGTAC           |
| tRNA-Leu-CAA intron                            | TCCCCACCGCGGAGGAAGCTTAG             |
| tRNA-Leu-CAA mature                            | CATTGGAGACCAGAACTTGAGTCTG           |
| <b>Primers for RT-qPCR (5' to 3')</b>          |                                     |
| actin forward                                  | ATCAAGATCATTGCTCCTCCTGAG            |
| actin reverse                                  | CTGCTTGCTGATCCACATCTG               |
| AluY forward                                   | AGATCGAGACCATCCTGGCT                |
| AluY reverse                                   | GCCATTCTCCTGCCTCAGCCT               |
| LINE-1 ORF1 forward                            | TCAAAGGAAAGCCCATCAGACTA             |
| LINE-1 ORF1 reverse                            | TTGGCCCCACTCTCTTCT                  |
| divergent LINE forward                         | TCAGAAGTGGGGATCTATGGAGGAC           |
| divergent LINE reverse                         | AGATGGTCCCTCAACACCACG               |
| RNVU1-6 forward                                | AGGAGAGATACCCTGGTCACGAAG            |
| RNVU1-6 3' reverse                             | GTTTCTGCAGCAAACAAAACCTATT           |
| 5.8S forward                                   | CTTAGCGGTGGATCACTCGG                |
| 5.8S reverse                                   | AGTGCGTTCGAAGTGTCGAT                |
| 18S forward                                    | GCTTAATTTGACTCAACACGGGA             |
| 18S reverse                                    | AGCTATCAATCTGTCAATCCTGTC            |
| 28S forward                                    | TTCACCAAGCGTTGGATTGTT               |
| 28S reverse                                    | TGTCTGAACCTGCGGTTCT                 |
| rDNA IGS forward                               | AGCATTGTAAAGGGTGCCTGG               |
| rDNA IGS reverse                               | CGTCTCATCTGTGTGCTGGAGAA             |
| 7SL forward                                    | ATCGGGTGTCCGCACTAAG                 |
| 7SL reverse                                    | CACCCCTCCTTAGGCAACCT                |
| HIV gRNA forward                               | ACCCGGCCATAAAGCAAGAG                |
| HIV gRNA reverse                               | GTGCCCTTCTTTGCCACAAT                |
| U6 forward                                     | ATATACTAAAATTGGAACGATAC             |
| RNU6-8 3' reverse                              | CACACTGTTTCCTTAGTACTAATTAG          |
